# Supplementary material
Source: publisher figshare collection journal article supplement (https://tandf.figshare.com/articles/dataset/_/12320096)
Supplement: Supplementary file 2 [file 1]

**Supplementary table 2.** The h-CBCs and CBCs matrix of species in *Hariotina* (h-CBCs/CBCs).

| species               | strain  | SZ5-1 | HND41-5 | HND25-3 | BN9-1 | GL1-4 | BN3-2 | GL28-1 | BN14-1 |
|-----------------------|---------|-------|---------|---------|-------|-------|-------|--------|--------|
| <i>H. reticulata</i>  | SZ5-1   |       |         |         |       |       |       |        |        |
| <i>H. compacta</i>    | HND41-5 | 1/0   |         |         |       |       |       |        |        |
| <i>H. hainanensis</i> | HND25-3 | 5/1   | 4/1     |         |       |       |       |        |        |
|                       | BN9-1   | 4/0   | 5/0     | 1/0     |       |       |       |        |        |
|                       | GL1-4   | 4/0   | 5/0     | 1/0     | 0/0   |       |       |        |        |
| <i>H. polychorda</i>  | BN3-2   | 3/0   | 3/0     | 6/1     | 5/0   | 5/0   |       |        |        |
| <i>H. guilinensis</i> | GL28-1  | 3/1   | 4/1     | 7/1     | 6/1   | 6/1   | 5/1   |        |        |
| <i>H. laxa</i>        | BN14-1  | 4/7   | 4/7     | 8/8     | 6/7   | 6/7   | 5/7   | 4/7    |        |
