# Supplementary material
Source: publisher figshare collection journal article supplement (https://tandf.figshare.com/articles/dataset/_/12320096)
Supplement: Supplementary file 3 [file 1]

**Supplementary table 1.** Strains whose sequences were downloaded from the GenBank.

| Taxon                                                                        | Strain identifier  | 18S      | ITS      | <i>tufA</i> |
|------------------------------------------------------------------------------|--------------------|----------|----------|-------------|
| <i>Asterarcys quadricellulare</i> (K. Behre) E.Hegewald & A.Schmidt          | FACHB-2316         | MH176109 | MH176123 | MH176155    |
| <i>Chodatodesmus australis</i> Sciuto, Verleyen, Moro & La Rocca             | II-11              | FJ946893 | HG514415 | HG514387    |
| <i>Chodatodesmus australis</i> Sciuto, Verleyen, Moro & La Rocca             | B6-6               | FJ946896 | HG514416 | HG514388    |
| <i>Chodatodesmus mucronulatus</i> (Chodat) Hegewald & al.                    | SAG 2332           | LN875037 | HG514419 | HG514398    |
| <i>Coelastrella saipanensis</i> N.Hanagata                                   | FACHB-2138 =LY31-2 | MF407353 | MF383401 | MF423120    |
| <i>Coelastrella striolata</i> Chodat                                         | CAUP H 3602        | JX513881 | JX513881 | /           |
| <i>Coelastrella vacuolata</i> (I.Shihira & R.W.Krauss) Hegewald & N.Hanagata | SAG 211-8b         | X56104   | HG514423 | HG514403    |
| <i>Coelastropsis costata</i> (Korshikov) Fott & Kalina                       | SAG217.5           | AF388374 | GQ375096 | /           |
| <i>Coelastrum proboscideum</i> Bohlin                                        | SAG217-2           | KF673364 | KF673364 | /           |
| <i>Coelastrum</i> sp.                                                        | YN15-2             | /        | /        | MK408737    |
| <i>Coelastrum sphaerium</i> N ägeli                                          | SAG217-3           | GQ375099 | GQ375099 | /           |
| <i>Coelastrum sphaerium</i> N ägeli                                          | CCMA_UFSCar 060    |          |          | KT003382    |
| <i>Desmodesmus armatus</i> (Chodat) E.H.Hegewald                             | GM4h               | AB917135 | AB917135 | /           |
| <i>Desmodesmus bicellularis</i> (Chodat) S.S.An, T.Friedl & E.Hegewald       | GM4g               | AB917134 | AB917134 | /           |
| <i>Desmodesmus communis</i>                                                  | SAG 2057           | /        | /        | HG514391    |
| <i>Desmodesmus pannonicus</i> (Hortob ägyi) E.Hegewald                       | GM4n               | AB917139 | AB917139 | /           |
| <i>Desmodesmus pirkollei</i>                                                 | SAG 2042           | /        | /        | HG514394    |
| <i>Flechtneria rotunda</i> Sciuto & L.A.Lewis                                | BCP-SEV3VF49       | AF513373 | AY510465 | HQ246371    |
| <i>Flechtneria rotunda</i> Sciuto & L.A.Lewis                                | BCP-SEV3VF4        | HQ246317 | HQ246446 | HQ246372    |
| <i>Hariotina reticulata</i> P.A.Dangeard                                     | SAG 8.81           | AH012395 | GQ375101 | /           |
| <i>Hariotina reticulata</i> P.A.Dangeard                                     | KMMCC1448          | /        | JQ315777 | /           |
| <i>Hariotina reticulata</i> P.A.Dangeard                                     | UTEX 1365          | /        | /        | KC145528    |
| <i>Hariotina reticulata</i>                                                  | MMOGRB0030F        | /        | /        | KX131180    |

|                                     |             |          |          |          |
|-------------------------------------|-------------|----------|----------|----------|
| P.A.Dangeard                        |             |          |          |          |
| <i>Hariotina reticulata</i>         | /           | /        | /        | KY792686 |
| P.A.Dangeard                        |             |          |          |          |
| Hydrodictyaceae sp.                 | HND10-6     | MH176112 | MH176134 | MH176157 |
| <i>Hydrodictyon reticulatum</i>     | HAM0289     | /        | /        | KY114065 |
| (Linnaeus) Bory                     |             |          |          |          |
| <i>Parapediastrum biradiatum</i>    | UTEX 37     | AY663034 | KC145471 | /        |
| (Meyen) E.Hegewald                  |             |          |          |          |
| <i>Pediastrum duplex</i> Meyen      | UTEX 1364   | AY779859 | AY577734 | /        |
| <i>Pediastrum duplex</i> Meyen      | Mj2008-54   | HM021299 | HM021299 | /        |
| <i>Scenedesmus hindakii</i>         | SAG 47.86   | AB037098 | AY170856 | HG514397 |
| E.Hegewald & N.Hanagata             |             |          |          |          |
| <i>Scenedesmus obtusus</i> Meyen    | CCAP 276/36 | AB037091 | HG514425 | HG514405 |
| <i>Scenedesmus obtusus</i> Meyen    | SAG 52.80   | X81966   | HG514421 | HG514400 |
| <i>Tetradesmus bajacalifornicus</i> | SAG 22.81   | HQ246319 | HQ246448 | HQ246374 |
| L.A.Lewis & Flechtner               |             |          |          |          |
| <i>Tetradesmus deserticola</i>      | BCP-YPGChar | AY510463 | AY510472 | HQ246380 |
| L.A.Lewis & Flechtner               |             |          |          |          |
| <i>Tetradesmus wisconsinensis</i>   | ZA1-2       | AB037096 | HG514430 | HG514412 |
| G.M.Smith                           |             |          |          |          |

---
