# Supplementary material
Source: publisher figshare collection journal article supplement (https://tandf.figshare.com/articles/dataset/_/12320096)
Supplement: Supplementary file 4 [file 1]

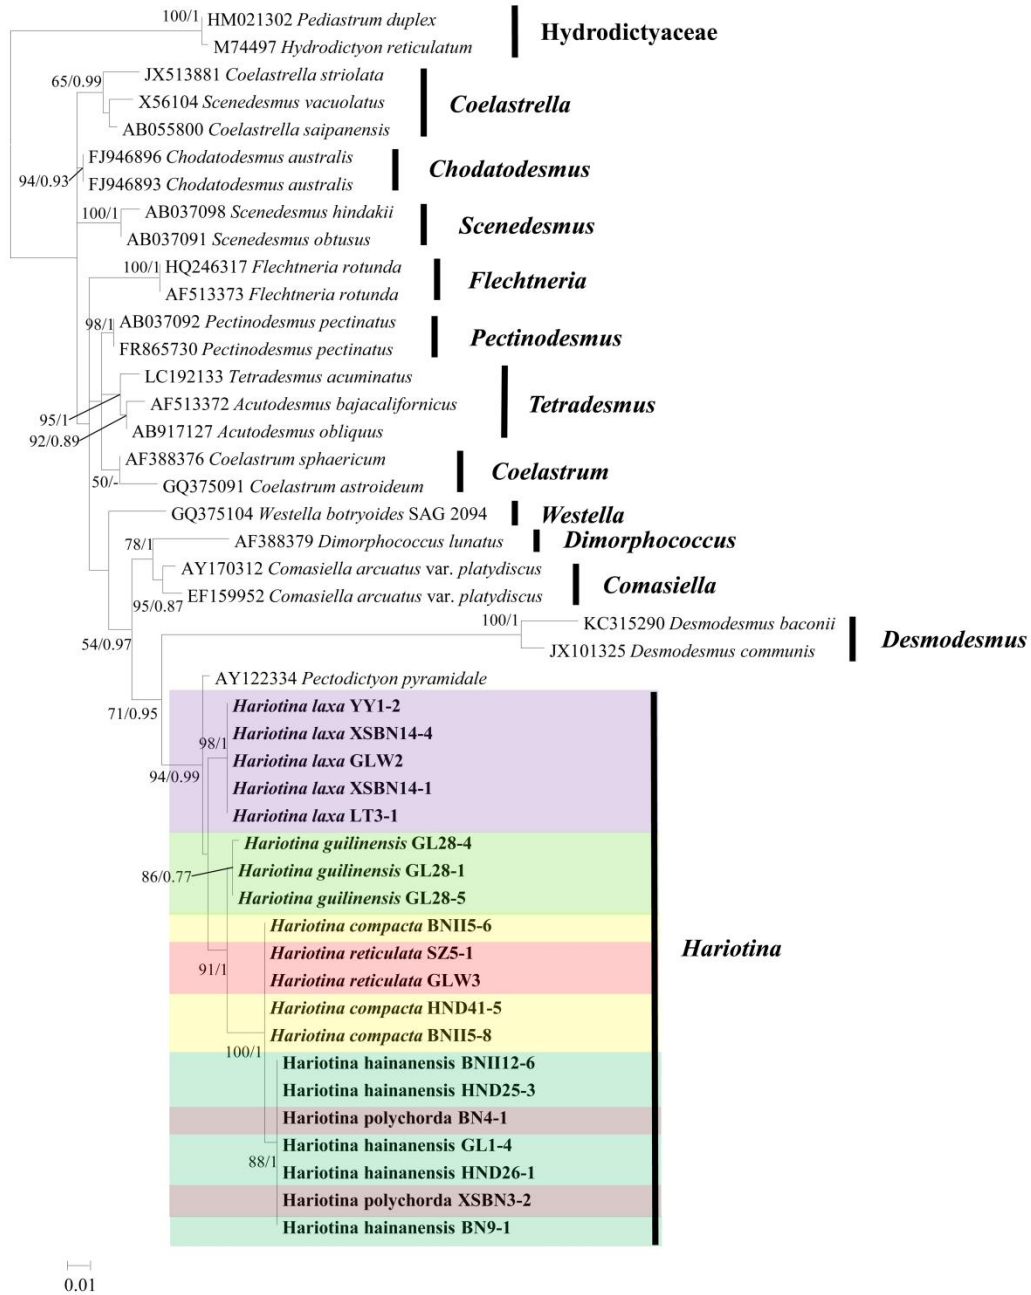

**Supplementary fig. 2.** Maximum-likelihood phylogenetic tree inferred from 18S sequences. Only bootstrap values above 50 and Bayesian posterior probabilities above 0.75 are shown. Boxes of the same colour represent the same species in *Hariotina*. Serial number represents intron insertion type. The strains provided in this study are indicated in bold.
