# Supplementary material
Source: publisher figshare collection journal article supplement (https://tandf.figshare.com/articles/dataset/_/12320096)

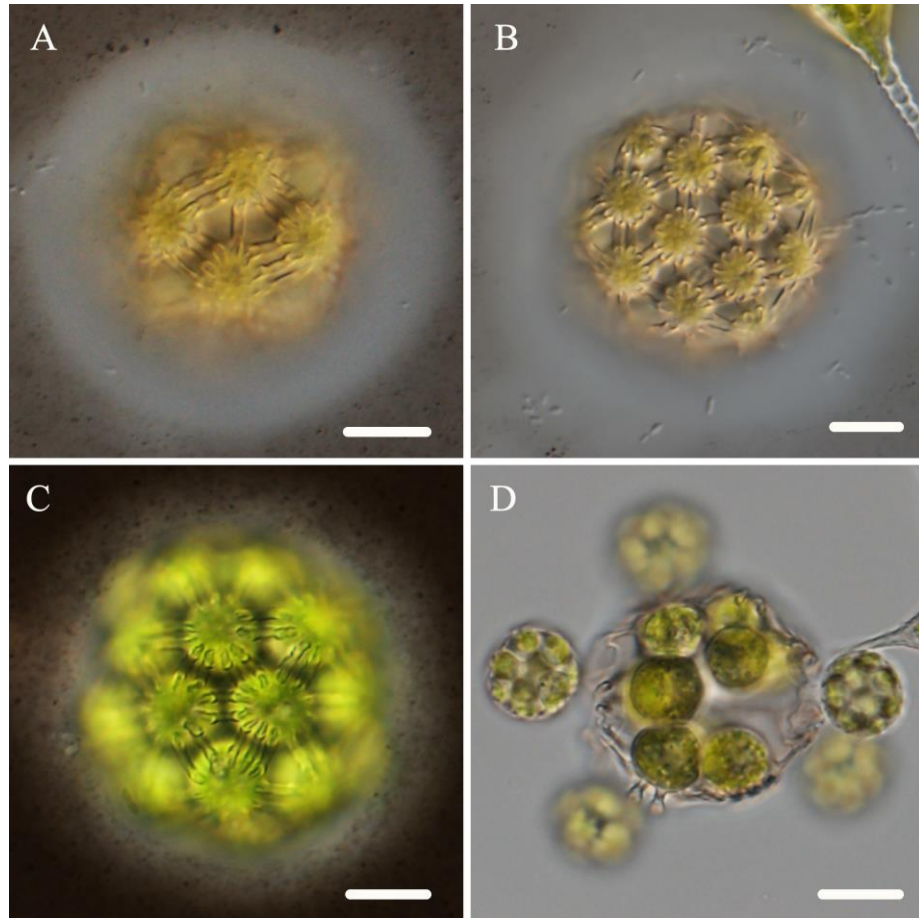

**Supplementary fig. 1.** Morphology of *Hariotina polychorda*. Scale bar = 10  $\mu\text{m}$

Supplement: Supplementary file 1 [file 1]
